# Supplementary material
Source: PubMed Central journal article supplement (PMC5204316)
Supplement: DB160915SupplementaryData.pdf [file DB160915SupplementaryData.pdf]

SUPPLEMENTARY DATA

**Supplementary Figure 1. Mitochondrial volume density for the aortic endothelium.** STZ-induced diabetic WT mice were administrated with metformin (300 mg/kg/d) for 4 weeks or intraperitoneally injected with insulin (STZ+Ins, 0.5 U/kg, twice per day) for 14 days. Quantification of mitochondrial volume density in aortic endothelium. n = 6 mice, at least 50 mitochondria per mice were analyzed. \*  $P < 0.05$  vs. Veh.

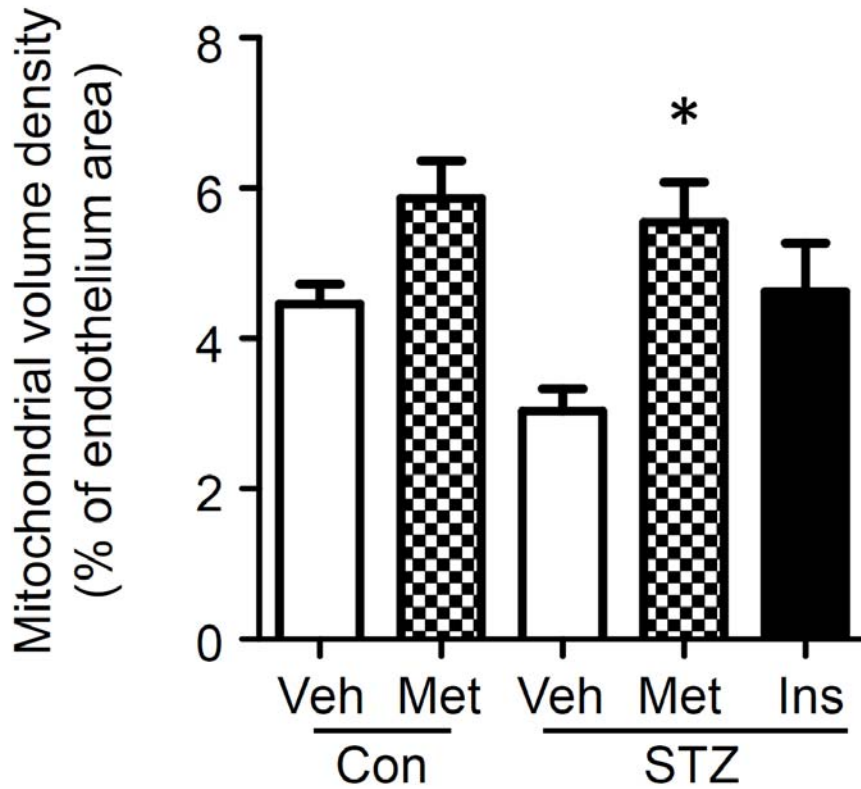

SUPPLEMENTARY DATA

**Supplementary Figure 2. AMPK $\alpha$ 2 siRNA transfection silences AMPK $\alpha$ 2 expression.** HUVECs were transfected with control siRNA or AMPK $\alpha$ 2 siRNA for 48 h, then pretreated with 2 mM metformin for 2 h and cultured with high glucose medium for 24 h.

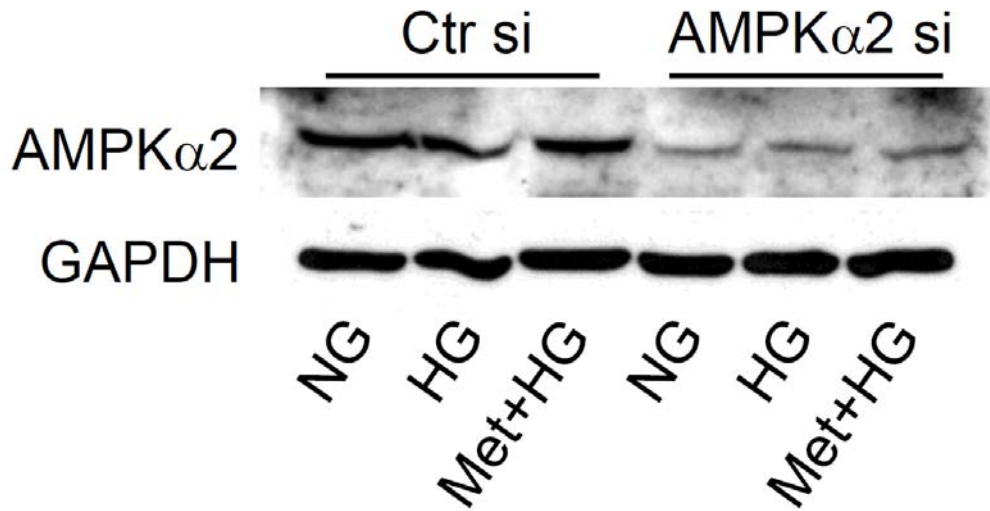

SUPPLEMENTARY DATA

**Supplementary Figure 3. Metformin increased the expression of PGC-1 $\alpha$  and mtTFA.** STZ-induced diabetic WT mice were administered metformin (300 mg/kg/d) in drinking water for 4 weeks. Mitochondrial biogenesis-related proteins, including peroxisome proliferator-activated receptor gamma coactivator 1-alpha (PGC-1 $\alpha$ ) and mitochondrial transcription factor A (mtTFA) in the aorta were analyzed by western blotting.

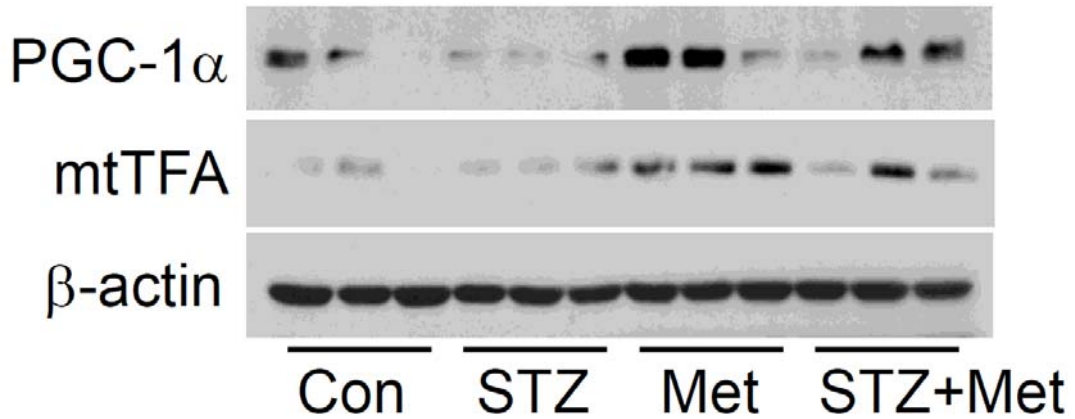

SUPPLEMENTARY DATA

**Supplementary Figure 4. Metformin treatment reduces Drp1 expression and translocation into mitochondria.**

**A-B:** STZ-induced diabetic WT mice were intraperitoneally injected with 0.5 U/kg insulin for 14 days (A) or administered metformin (300 mg/kg/d) in drinking water for 4 weeks (B). Quantification of Drp1 expression in the aorta. *n* = 5 mice. **C:** Quantification of positive staining for Drp1 in thoracic aortic sections from diabetic ApoE<sup>-/-</sup> and ApoE<sup>-/-</sup>/AMPKα2<sup>-/-</sup> mice treated with metformin. *n* = 5 mice. **D:** HUVECs were treated with HG for 24 hours, mannitol as osmotic control. Quantification of Drp1 expression in the HUVECs. *n* = 4 independent experiments. **E:** Quantification of MFF expression in the HUVECs, HVSMCs HeLa cells, and H1299 cells. *n* = 3 independent experiments. **F-G.** HUVEC were pretreated with 2 mM metformin for 2 h, followed by stimulation with high glucose for 24 h. Quantification of Drp1 expression in the cell lysis, cytoplasmic and mitochondrial fractions from HUVECs. *n* = 3 independent experiments. \**P* < 0.05 vs. Con or NG, #*P* < 0.05 vs. without metformin treatment.

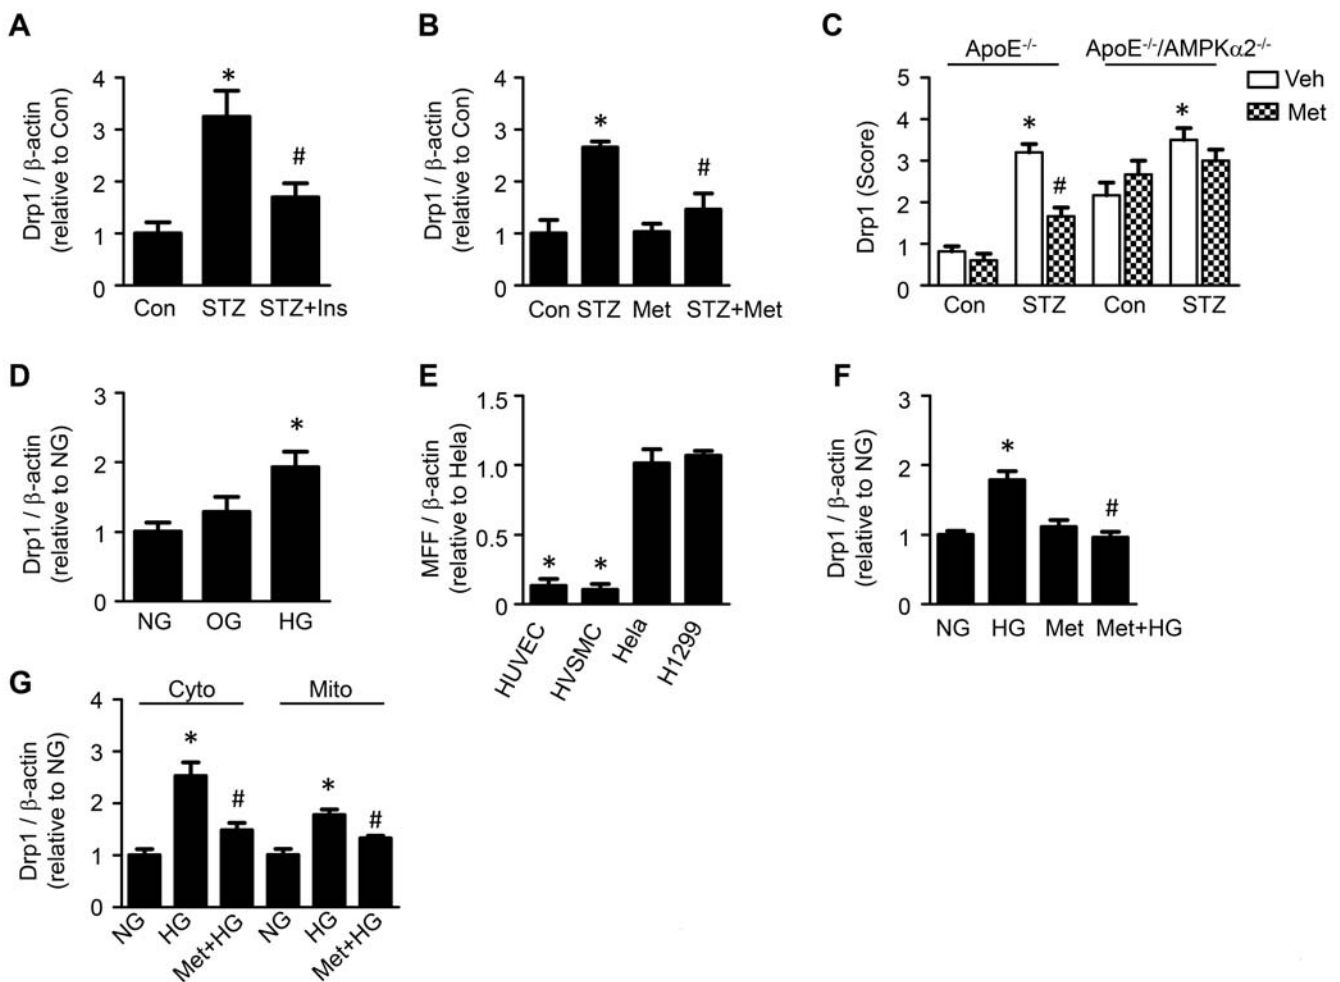

SUPPLEMENTARY DATA

**Supplementary Table 1. Antibody suppliers, catalog number and molecular weight.**

| Antibody        | Application | Supplier                  | Catalog number | Molecular weight (kDa) |
|-----------------|-------------|---------------------------|----------------|------------------------|
| 3-NT            | IHC         | EMD Millipore             | 06-284         |                        |
| 8-OHdG          | IHC         | Abcam                     | 62623          |                        |
| Drp1            | IHC         | ThermoFisher Scientific   | PA1-16986      |                        |
| ICAM-1          | IHC, IF     | Scant Cruz                | 7891           |                        |
| VCAM-1          | IHC, IF     | Scant Cruz                | 8304           |                        |
| p-ACC           | WB          | Cell Signaling Technology | 3661           | 280                    |
| p-AMPK          | WB          | Cell Signaling Technology | 2535           | 63                     |
| AMPK $\alpha$ 1 | WB          | Scant Cruz                | 130394         | 63                     |
| AMPK $\alpha$ 2 | WB          | Scant Cruz                | 19129          | 63                     |
| $\beta$ -actin  | WB          | Scant Cruz                | 47778          | 43                     |
| COX IV          | WB          | Abcam                     | 14744          | 17                     |
| Drp1            | WB          | Scant Cruz                | 271583         | 78-82                  |
| GAPDH           | WB          | Scant Cruz                | 137179         | 37                     |
| Fis1            | WB          | Enzo Life Science         | Alx-210-1037   | 17                     |
| LDH             | WB          | Scant Cruz                | 33781          | 35                     |
| MFN2            | WB          | Abcam                     | 56889          | 86                     |
| MFN             | WB          | Scant Cruz                | 515648         | 25-39                  |
| mtTFA           | WB          | Scant Cruz                | 23588          | 25                     |
| OPA1            | WB          | Abcam                     | 42364          | 80-100                 |
| PGC-1 $\alpha$  | WB          | Scant Cruz                | 13067          | 91                     |

SUPPLEMENTARY DATA

**Supplementary Table 2. Effects of metformin (Met) on blood glucose, lipid profiles and body weight in diabetic ApoE<sup>-/-</sup> and ApoE<sup>-/-</sup>/AMPKα2<sup>-/-</sup> mice.**

|                           | ApoE <sup>-/-</sup> |          |           |           | ApoE <sup>-/-</sup> /AMPKα2 <sup>-/-</sup> |          |           |           |
|---------------------------|---------------------|----------|-----------|-----------|--------------------------------------------|----------|-----------|-----------|
|                           | Con                 | Met      | STZ       | STZ + Met | Con                                        | Met      | STZ       | STZ + Met |
| Body weight<br>(g)        | 26.3±0.7            | 26.0±0.5 | 23.5±0.3* | 23.3±0.2* | 25.9±0.5                                   | 25.1±0.6 | 23.7±0.6* | 23.0±0.6* |
| Glucose<br>(mg/dL)        | 146±6               | 135±10   | 428±56*   | 444±52*   | 140±10                                     | 130±6    | 443±29*   | 395±30*   |
| Cholesterol<br>(mmol/L)   | 7.4±0.6             | 7.0±0.3  | 10.1±0.7* | 9.0±0.8*  | 7.4±0.3                                    | 7.0±0.5  | 9.4±0.8*  | 10.8±2*   |
| Triglycerides<br>(mmol/L) | 1.0±0.2             | 1.1±0.3  | 0.9±0.1   | 1.1±0.1   | 1.1±0.1                                    | 1.1±0.2  | 1.0±0.1   | 1.2±0.1   |

N = 8–10; \*P < 0.05 vs. Con.

SUPPLEMENTARY DATA

**Supplementary Table 3. Effects of mdivi-1 on blood glucose, lipid profiles, and body weight in diabetic ApoE<sup>-/-</sup> mice.**

|                          | Con      | Con + Mdivi-1 | STZ       | STZ + Mdivi-1 |
|--------------------------|----------|---------------|-----------|---------------|
| Body Weight (g)          | 26.3±0.7 | 25.0±0.6      | 23.6±0.9  | 23.8±0.9      |
| Glucose (mg/dL)          | 156±6    | 149±9         | 469±55*   | 457±43*       |
| Cholesterol<br>(mg/dL)   | 7.8±0.2  | 10.1±0.5      | 12.4±1.0* | 15.2±0.8*     |
| Triglycerides<br>(mg/dL) | 0.9±0.1  | 0.9±0.1       | 1.0±0.1   | 1.1±0.0       |

N = 10; \**P* < 0.05 vs. Con.
